# 1 High-performance pipeline for MutMap and QTL-seq

2

3 **Yu Sugihara<sup>1,2</sup>, Lester Young<sup>3</sup>, Hiroki Yaegashi<sup>1</sup>, Satoshi Natsume<sup>1</sup>, Daniel J. Shea<sup>1</sup>,**  
4 **Hiroki Takagi<sup>4</sup>, Helen Booker<sup>3</sup>, Hideki Innan<sup>5</sup>, Ryohei Terauchi<sup>1,2</sup>, Akira Abe<sup>1,\*</sup>**

5 <sup>1</sup>Department of Genomics and Breeding, Iwate Biotechnology Research Center, Kitakami 024-

6 0003, Japan., <sup>2</sup>Graduate School of Agriculture, Kyoto University, Kyoto 606-8267, Japan.,

7 <sup>3</sup>Department of Plant Sciences, University of Saskatchewan, Saskatoon, SK S7N 5A8, Canada.,

8 <sup>4</sup>Faculty of Bioresources and Environmental Sciences, Ishikawa Prefectural University, Nonouchi

9 921-8836, Japan. , <sup>5</sup>Graduate University for Advanced Studies, Hayama, 240-0193, Japan.

10 \*To whom correspondence should be addressed.

11

## 12 **Abstract**

13 Bulk segregant analysis implemented in MutMap and QTL-seq is a powerful and efficient  
14 method to identify agronomically important loci. However, the previous pipelines were not user-  
15 friendly to install and run. Here, we describe new pipelines for MutMap and QTL-seq. These  
16 updated pipelines are approximately 5-8 times faster than the previous pipeline, are easier for  
17 novice users to use and can be easily installed through bioconda with all dependencies.

18

## 19 **1 Introduction**

20 Bulk segregant analysis, as implemented in MutMap (Abe *et al.*, 2012) and QTL-seq (Takagi  
21 *et al.*, 2013), is a powerful and efficient method to identify agronomically important loci in crop  
22 plants. MutMap requires whole-genome resequencing of a single individual from the original  
23 cultivar and the pooled sequences of F<sub>2</sub> progeny from a cross between the original cultivar and  
24 mutant. MutMap uses the sequence of the original cultivar to polarize the site frequencies of  
25 neighboring markers and identifies loci with an unexpected site frequency, simulating the  
26 genotype of F<sub>2</sub> progeny.

27 QTL-seq was adapted from MutMap to identify quantitative trait loci. It utilizes sequences  
28 pooled from two segregating progeny populations with extreme opposite traits (e.g. resistant vs.  
29 susceptible) and single whole-genome resequencing of either of the parental cultivars. While the  
30 original QTL-seq algorithm did not assume a highly heterozygous genome, a “modified QTL-seq”  
31 has been developed to handle this situation using high resolution mapping (Itoh *et al.*, 2019).

32 Despite their usefulness, these programs were not user-friendly to install or run and required  
33 multiple user inputs. Another problem was that the programs required Coval (Kosugi *et al.*, 2013)  
34 for variant calling, which relied on older versions of SAMtools (before 0.1.8).

35 In this study, we describe newly developed pipelines for MutMap and QTL-seq with updated  
36 features.

## 37 **2 Implementation**

38 The new pipelines support read trimming by Trimmomatic (Bolger *et al.*, 2014), replacing  
39 fastx-toolkit in the previous pipeline. Trimmed reads are aligned by BWA-MEM (Li and Durbin,  
40 2009), replacing BWA-SAMPE, BWA-ALN and Coval. Improperly paired reads are filtered by  
41 SAMtools (Li *et al.*, 2009). Subsequently, a VCF file is generated by the “mpileup” command  
42 implemented in BCFtools (Li, 2011). The user can start the analysis from any point in the process,  
43 e.g. - from raw FASTQs, trimmed FASTQs, BAM files, or a VCF file. MutPlot and QTL-plot,  
44 which are standalone programs, were developed for postprocessing of VCF files. Low-quality  
45 variants in a VCF file are filtered out based on mapping quality and strand bias and the actual and  
46 expected SNP-indexes calculated based on the AD (allele depth) value of each sample pool (Abe  
47 *et al.*, 2012). In QTL-seq, a  $\Delta$ SNP-index is calculated by subtracting one SNP-index from the  
48 other (Takagi *et al.*, 2013). As an option, multiple testing correction (Huang *et al.*, 2019) was also  
49 adopted to the simulation. Both pipelines ignore the SNPs which are missing in the parental  
50 sample. Candidate causal mutations in the VCF file are shown graphically after executing SnpEff  
51 (Cingolani *et al.*, 2012). The procedures are connected by a Python script.

## 52 **3 Results and Conclusions**

53 To compare the performance of the new and old pipelines, we ran MutMap and QTL-seq  
54 using four test datasets on an AMD EPYC 7501 processor (Base 2.0 GHz) with 48 GB RAM and  
55 12 threads [located at ROIS National Institute of Genetics in Japan]. The new MutMap and QTL-  
56 seq pipelines are approximately 5-8 times faster than the previous pipelines. The ability of the  
57 updated pipeline to use a wider range of input file formats reduces the time required for file-  
58 management and data handling and makes it easier to use the software.

59 Greatly reduced processing times for the updated pipelines were accomplished by utilizing  
60 more applications with parallel processing (Trimmomatic, SAMtools and BCFtools) and omitting  
61 the creation of a consensus FASTA file that had been implemented in the previous pipelines (Fig.  
62 1). Further time-savings were accomplished with the new pipeline by removing user interactions  
63 that were required in the previous version. Although the numbers of SNPs plotted were slightly  
64 different, the results of the old version and the new version were similar or had slightly better  
65 confidence index values (Supplementary figure).

66 Currently, these new pipelines can be installed through bioconda with all dependencies. The  
67 new pipelines of MutMap and QTL-seq have improved performance and are more user-friendly  
68 to install and run, making them very useful for the purpose of genetics studies.

## 69 **Acknowledgements**

70 Computations were performed on the NIG supercomputer at ROIS National Institute of Genetics.  
71 Additional runs of the QTLseq pipeline using flax resequencing data (unpublished results) were  
72 performed using ComputeCanada infrastructure ([www.computecanada.ca](http://www.computecanada.ca)).

## 73 **Funding**

74 This work was supported by JSPS KAKENHI Grant Number 17H03752 to AA. Support for LY  
75 and HB was through Saskatchewan Agriculture Ministry's Agriculture Development Fund Grants  
76 20160222 and 20170199 and Agriculture and AgriFoods Canada's Diverse Field Crops Cluster  
77 ASC-05.

78 *Conflict of Interest:* none declared.

79 **References**

- 80 Abe,A. *et al.* (2012) Genome sequencing reveals agronomically important loci in rice using  
81 MutMap. *Nat. Biotechnol.*, 30, 174–178.
- 82 Bolger,A.M. *et al.* (2014) Trimmomatic: a flexible trimmer for Illumina sequence data.  
83 *Bioinformatics*, 30, 2114–2120.
- 84 Cingolani,P. *et al.* (2012) A program for annotating and predicting the effects of single nucleotide  
85 polymorphisms, SnpEff. *Fly*, 6, 80–92.
- 86 Huang,L. *et al.* (2020) BRM: a statistical method for QTL mapping based on bulked segregant  
87 analysis by deep sequencing. *Bioinformatics*, 36, 2150-2156.
- 88 Itoh,N. *et al.* (2019) Next-generation sequencing-based bulked segregant analysis for QTL  
89 mapping in the heterozygous species *Brassica rapa*. *Theor. Appl. Genet.*, 132, 2913–2925.
- 90 Kosugi,S. *et al.* (2013) Coval: Improving Alignment Quality and Variant Calling Accuracy for  
91 Next-Generation Sequencing Data. *PLoS ONE*, 8.
- 92 Li,H. and Durbin,R. (2009) Fast and accurate short read alignment with Burrows-Wheeler  
93 transform. *Bioinformatics*, 25, 1754–1760.
- 94 Li,H. *et al.* (2009) The Sequence Alignment/Map format and SAMtools. *Bioinformatics*, 25,  
95 2078–2079.
- 96 Li,H. (2011) A statistical framework for SNP calling, mutation discovery, association mapping  
97 and population genetical parameter estimation from sequencing data. *Bioinformatics*, 27,  
98 2987–2993.
- 99 Takagi,H. *et al.* (2013) QTL-seq: rapid mapping of quantitative trait loci in rice by whole genome  
100 resequencing of DNA from two bulked populations. *Plant. J.*, 74, 174–183.

101

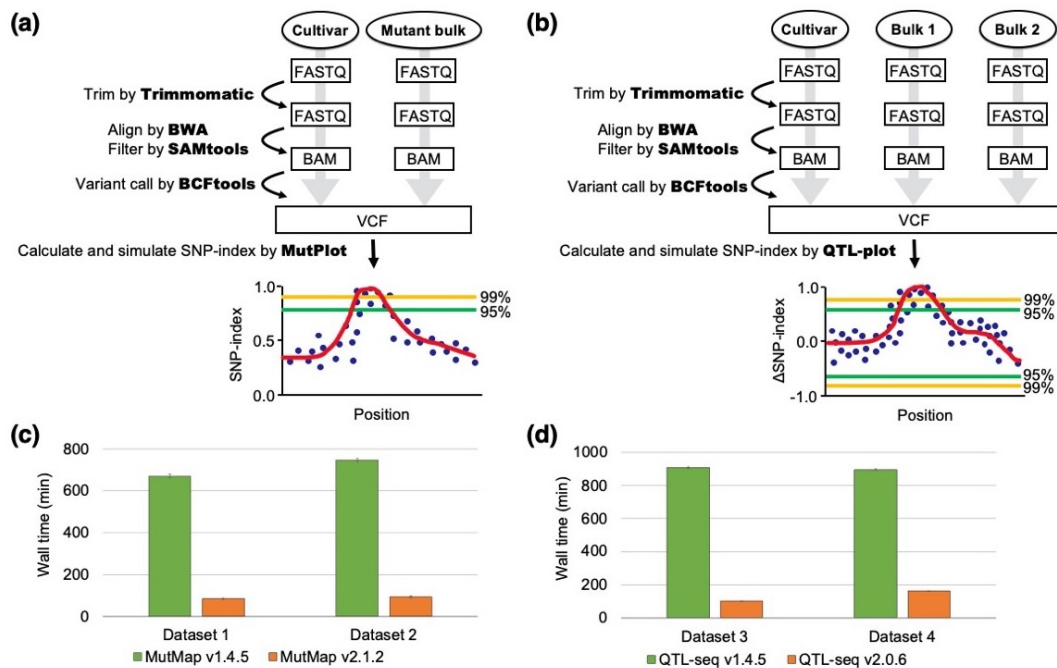

102

103

**Fig. 1.** Pipeline workflow and performance of MutMap and QTL-seq. (a) The pipeline

104

workflow of MutMap. (b) The pipeline workflow of QTL-seq. (c) Speed comparison

105

between new (v2.1.2) and old (v1.4.5) pipeline of MutMap. Dataset 1 (Hit1917-pl) and Dataset

106

2 (Hit1917-sd) can be downloaded as follows: DRR004451; an original rice cultivar

107

“Hitomebore”, DRR001785; mutant bulk of Hit1917-pl, DRR001787; mutant bulk of Hit1917-

108

sd (Abe *et al.*, 2012). (d) Speed comparison between new (v2.0.6) and old (v1.4.5) pipeline of

109

QTL-seq. Dataset 3, which was obtained from recombinant inbred lines (RILs) derived from a

110

cross between Nortai and Hitomebore, and Dataset 4, which was obtained from F<sub>2</sub> progeny

111

derived from a cross between Hitomebore and WRC57, can be downloaded as follows:

112

DRR004451; a parental rice cultivar “Hitomebore”, DRR003237 and DRR003238; two bulks

113

from RILs, DRR003341 and DRR003342; two bulks from F<sub>2</sub> progeny (Takagi *et al.*, 2013). The

114

tests were performed on AMD EPYC 7501 processor (Base 2.0 GHz) and 48 GB RAM with 12

115

threads, and the values are means  $\pm$  SD (n=3).

116

## High-performance pipeline for MutMap and QTL-seq

Yu Sugihara, Lester Young, Hiroki Yaegashi, Satoshi Natsume, Daniel J. Shea, Hiroki Takagi, Helen Booker, Hideki Innan, Ryohei Terauchi, Akira Abe

### Supplementary figure

(A) MutMap plot of Hit1917-pl from MutMap v1.4.5

(B) MutMap plot of Hit1917-pl from MutMap v2.1.2

(C) MutMap plot of Hit1917-sd from MutMap v1.4.5

(D) MutMap plot of Hit1917-sd from MutMap v2.1.2

(E) QTL-seq plot of RILs from QTL-seq v1.4.5

(F) QTL-seq plot of RILs from QTL-seq v2.0.6

(G) QTL-seq plot of F2 progeny from QTL-seq v1.4.5

(H) QTL-seq plot of F2 progeny from QTL-seq v2.0.6

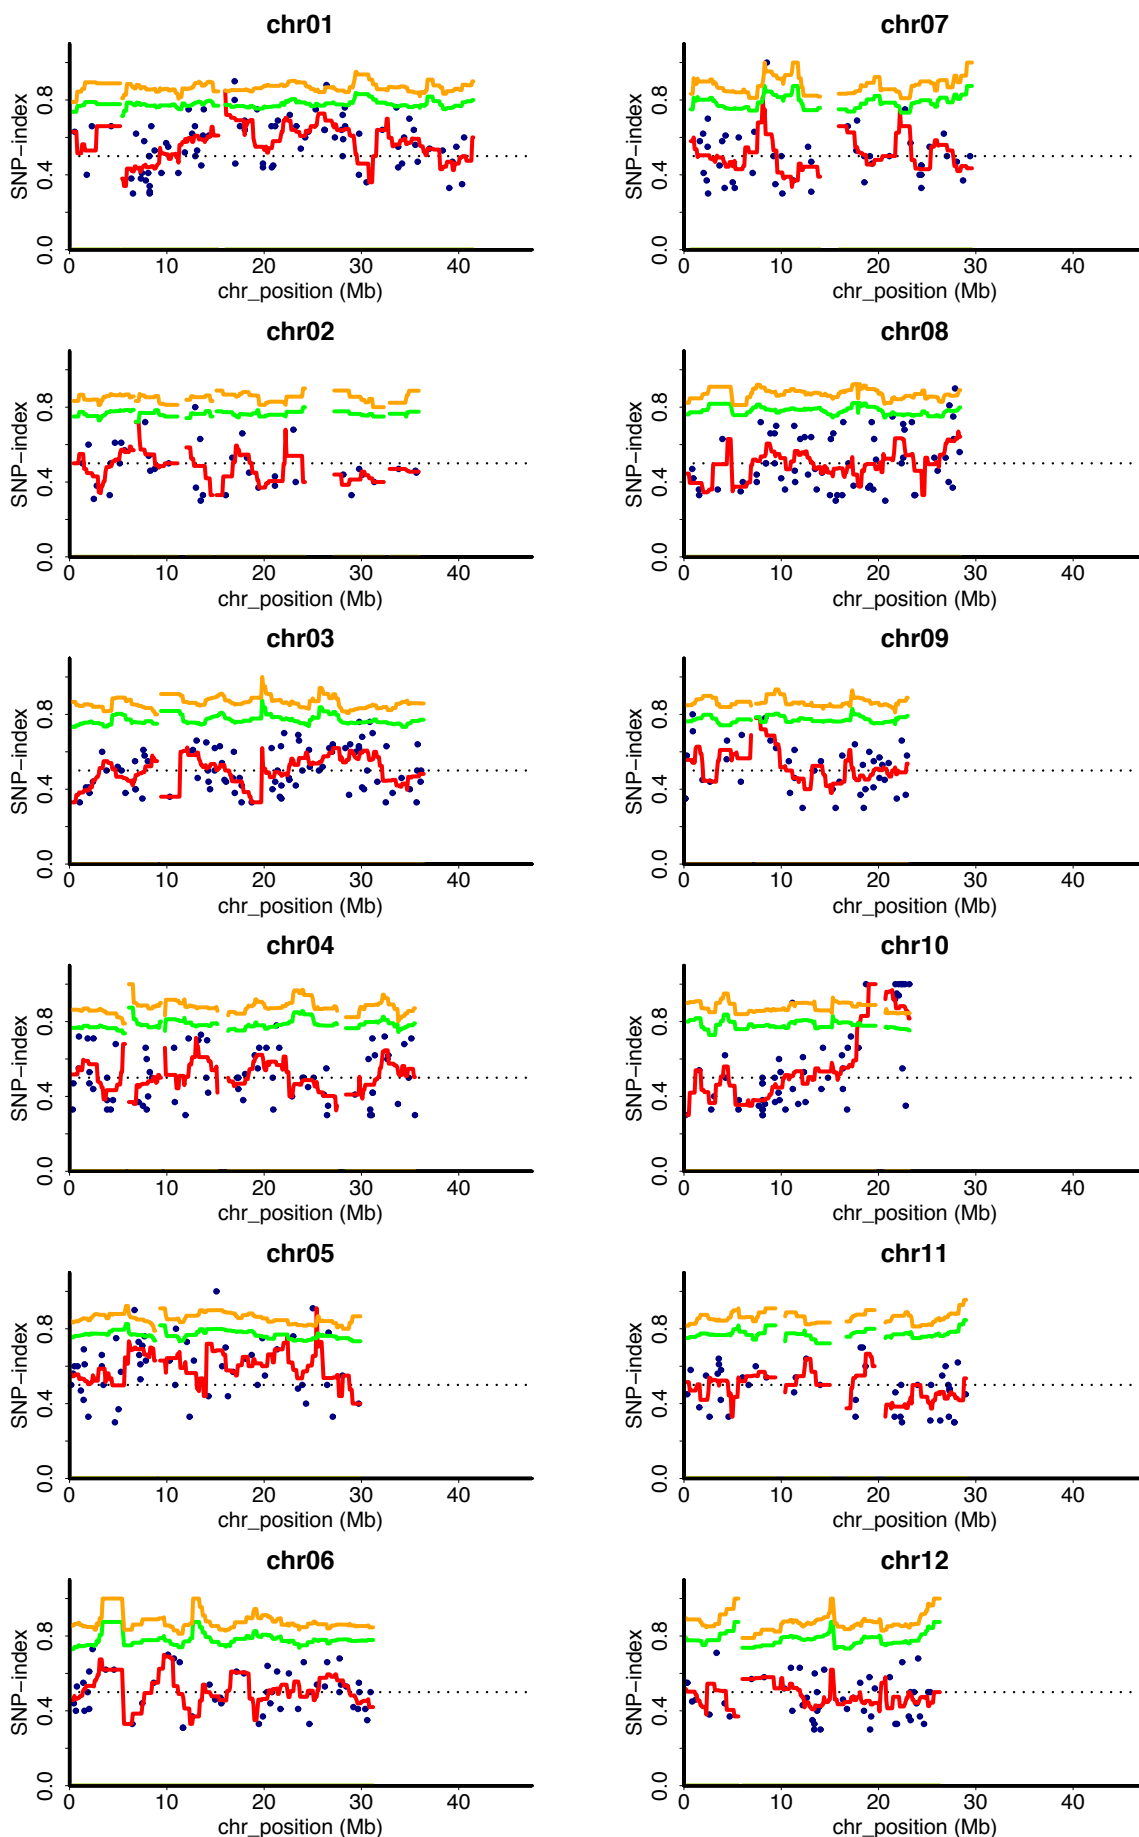

(A) MutMap plot of Hit1917-pl from MutMap v1.4.5

Statistical confidence intervals under the null hypothesis of no QTL are shown (green:  $P < 0.05$ ; yellow:  $P < 0.01$ ).

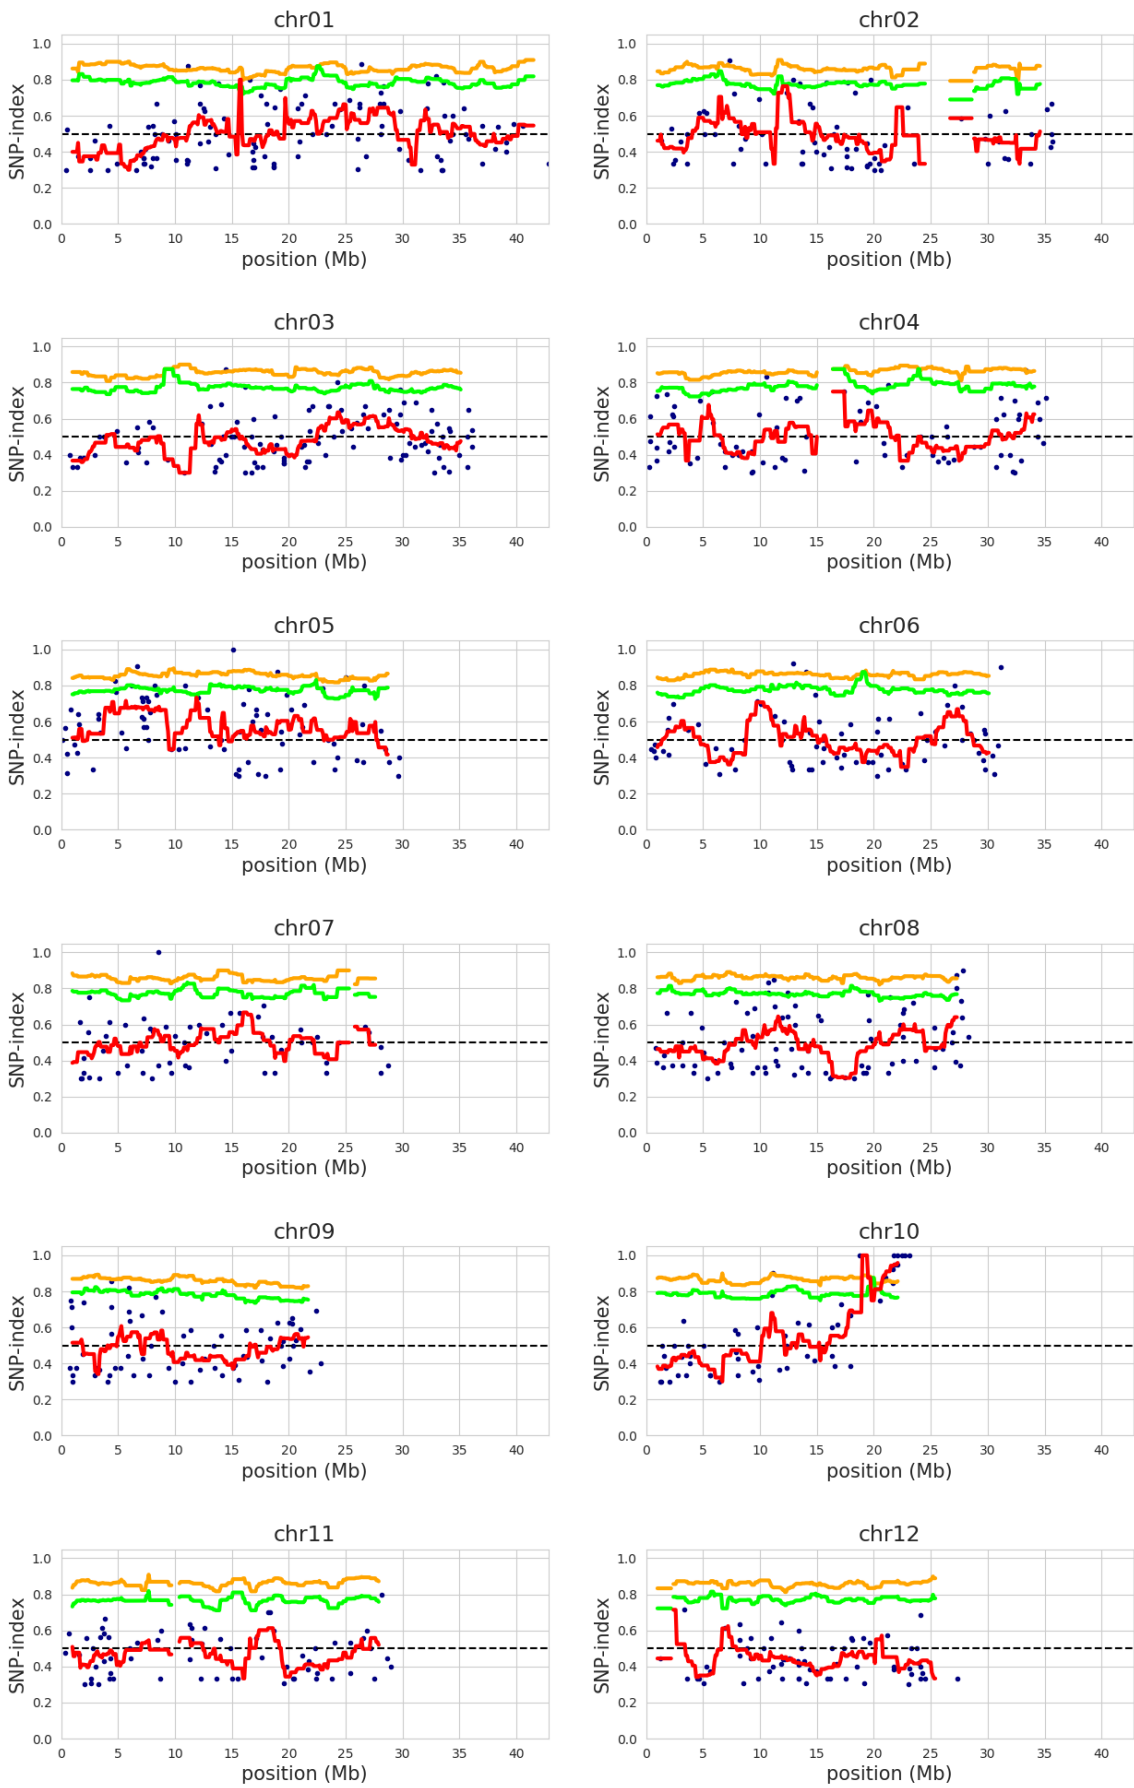

(B) MutMap plot of Hit1917-pl from MutMap v2.1.2

Statistical confidence intervals under the null hypothesis of no QTL are shown (green:  $P < 0.05$ ; yellow:  $P < 0.01$ ).



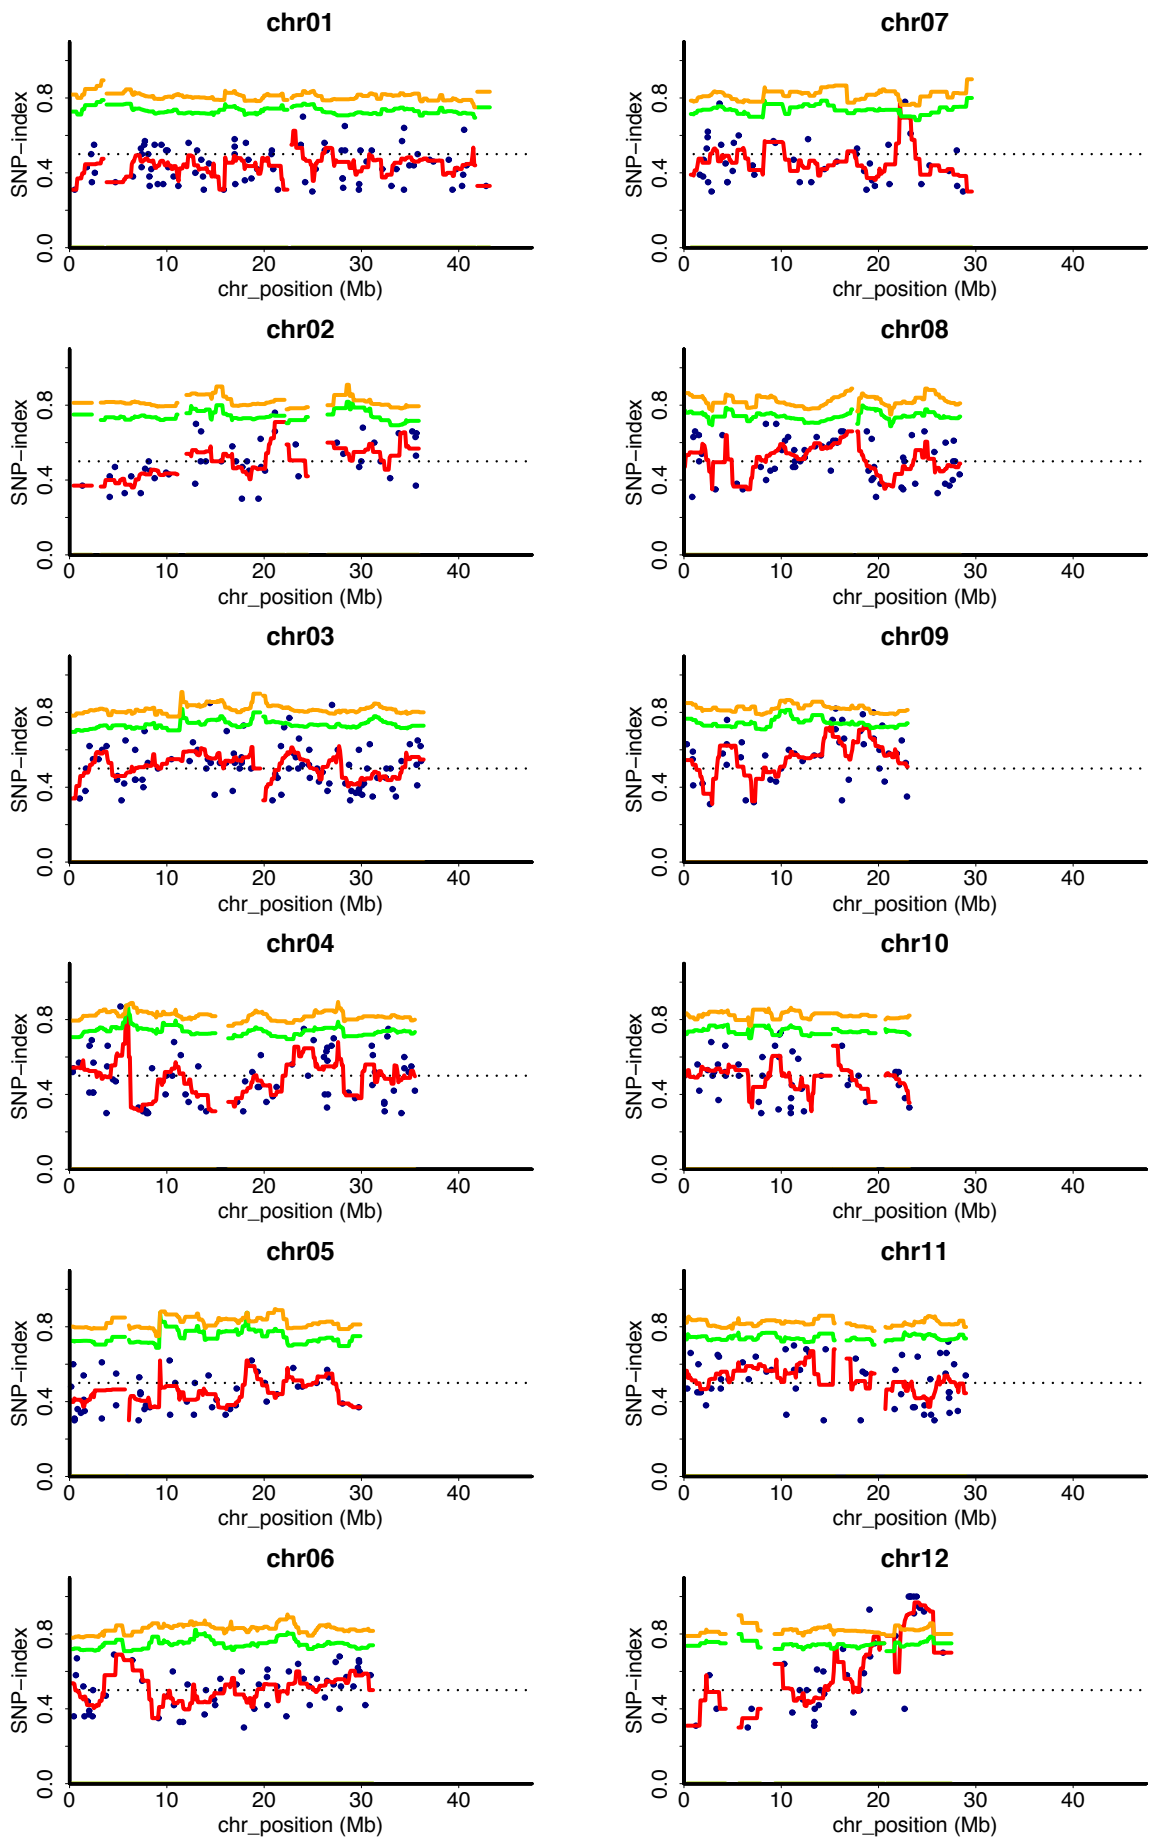

(C) MutMap plot Hit1917-sd from MutMap v1.4.5  
 Statistical confidence intervals under the null hypothesis of no QTL are shown (green:  $P < 0.05$ ; yellow:  $P < 0.01$ ).

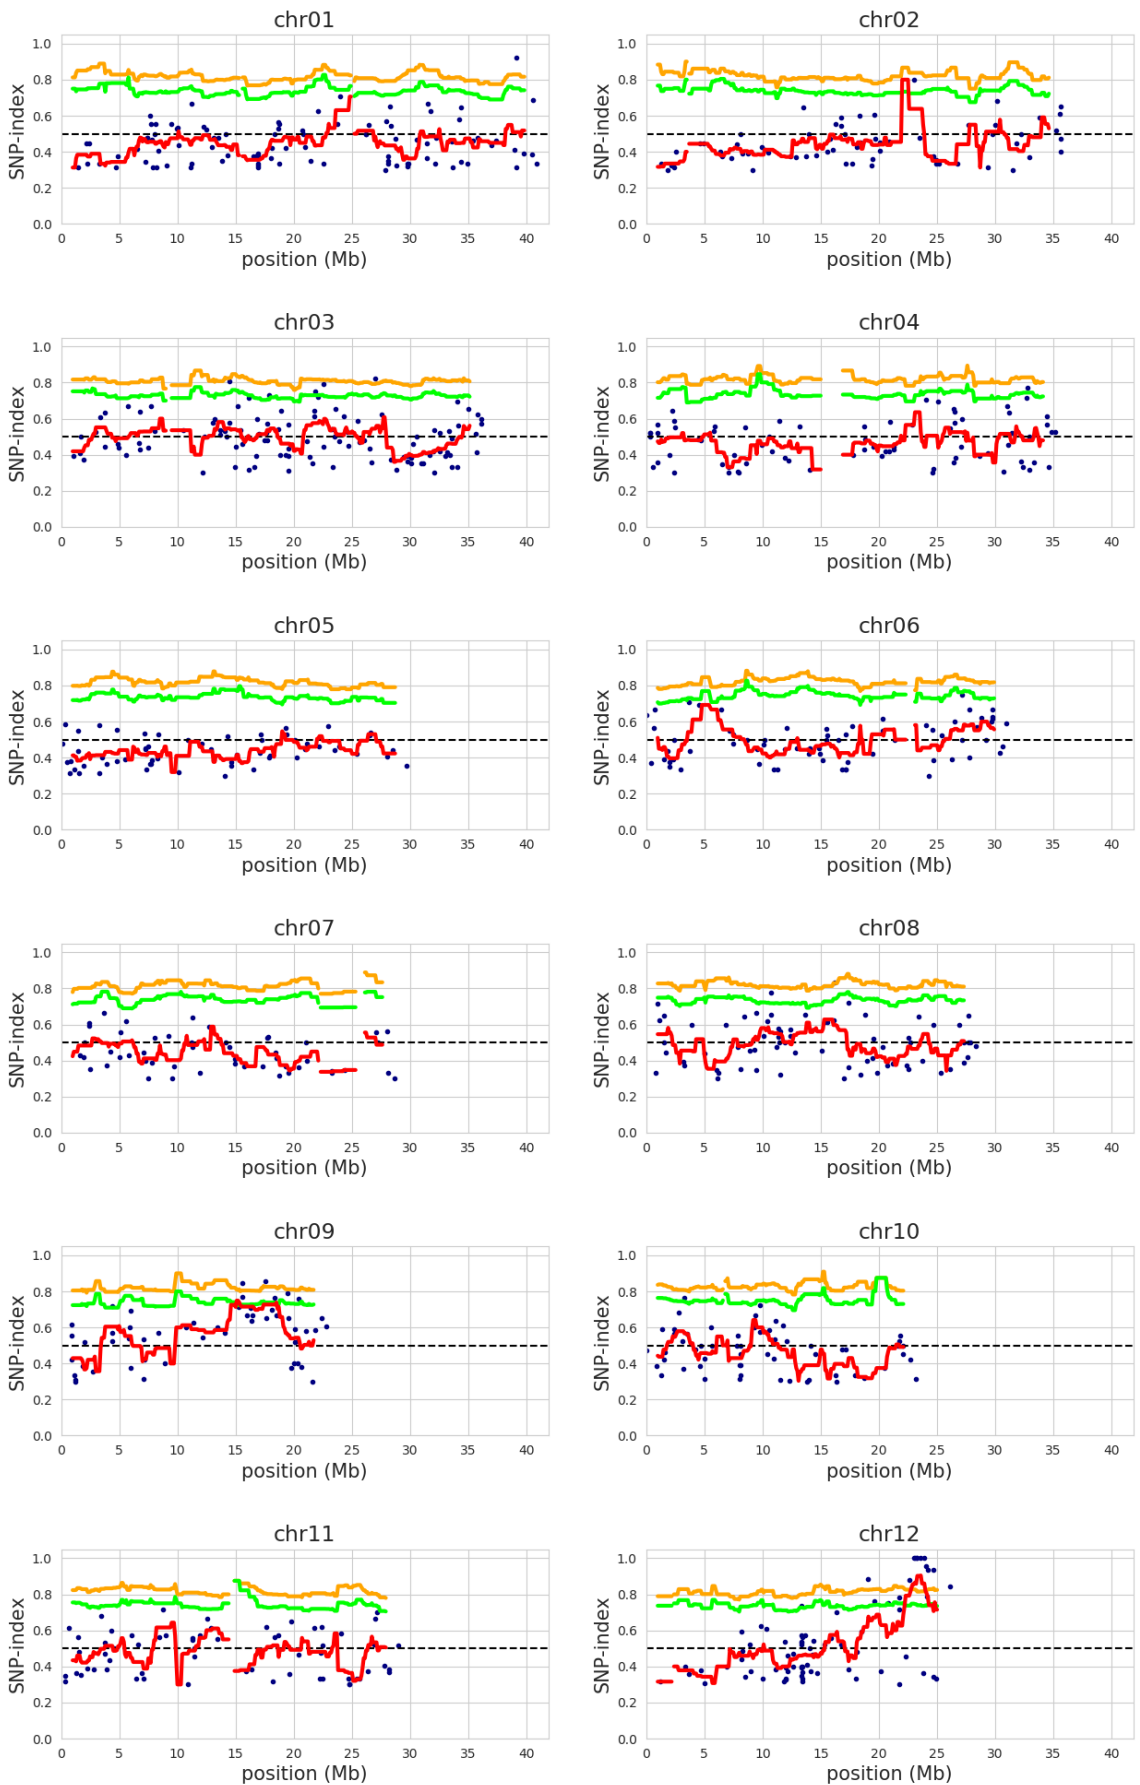

(D) MutMap plot of Hit1917-sd from MutMap v2.1.2

Statistical confidence intervals under the null hypothesis of no QTL are shown (green:  $P < 0.05$ ; yellow:  $P < 0.01$ ).

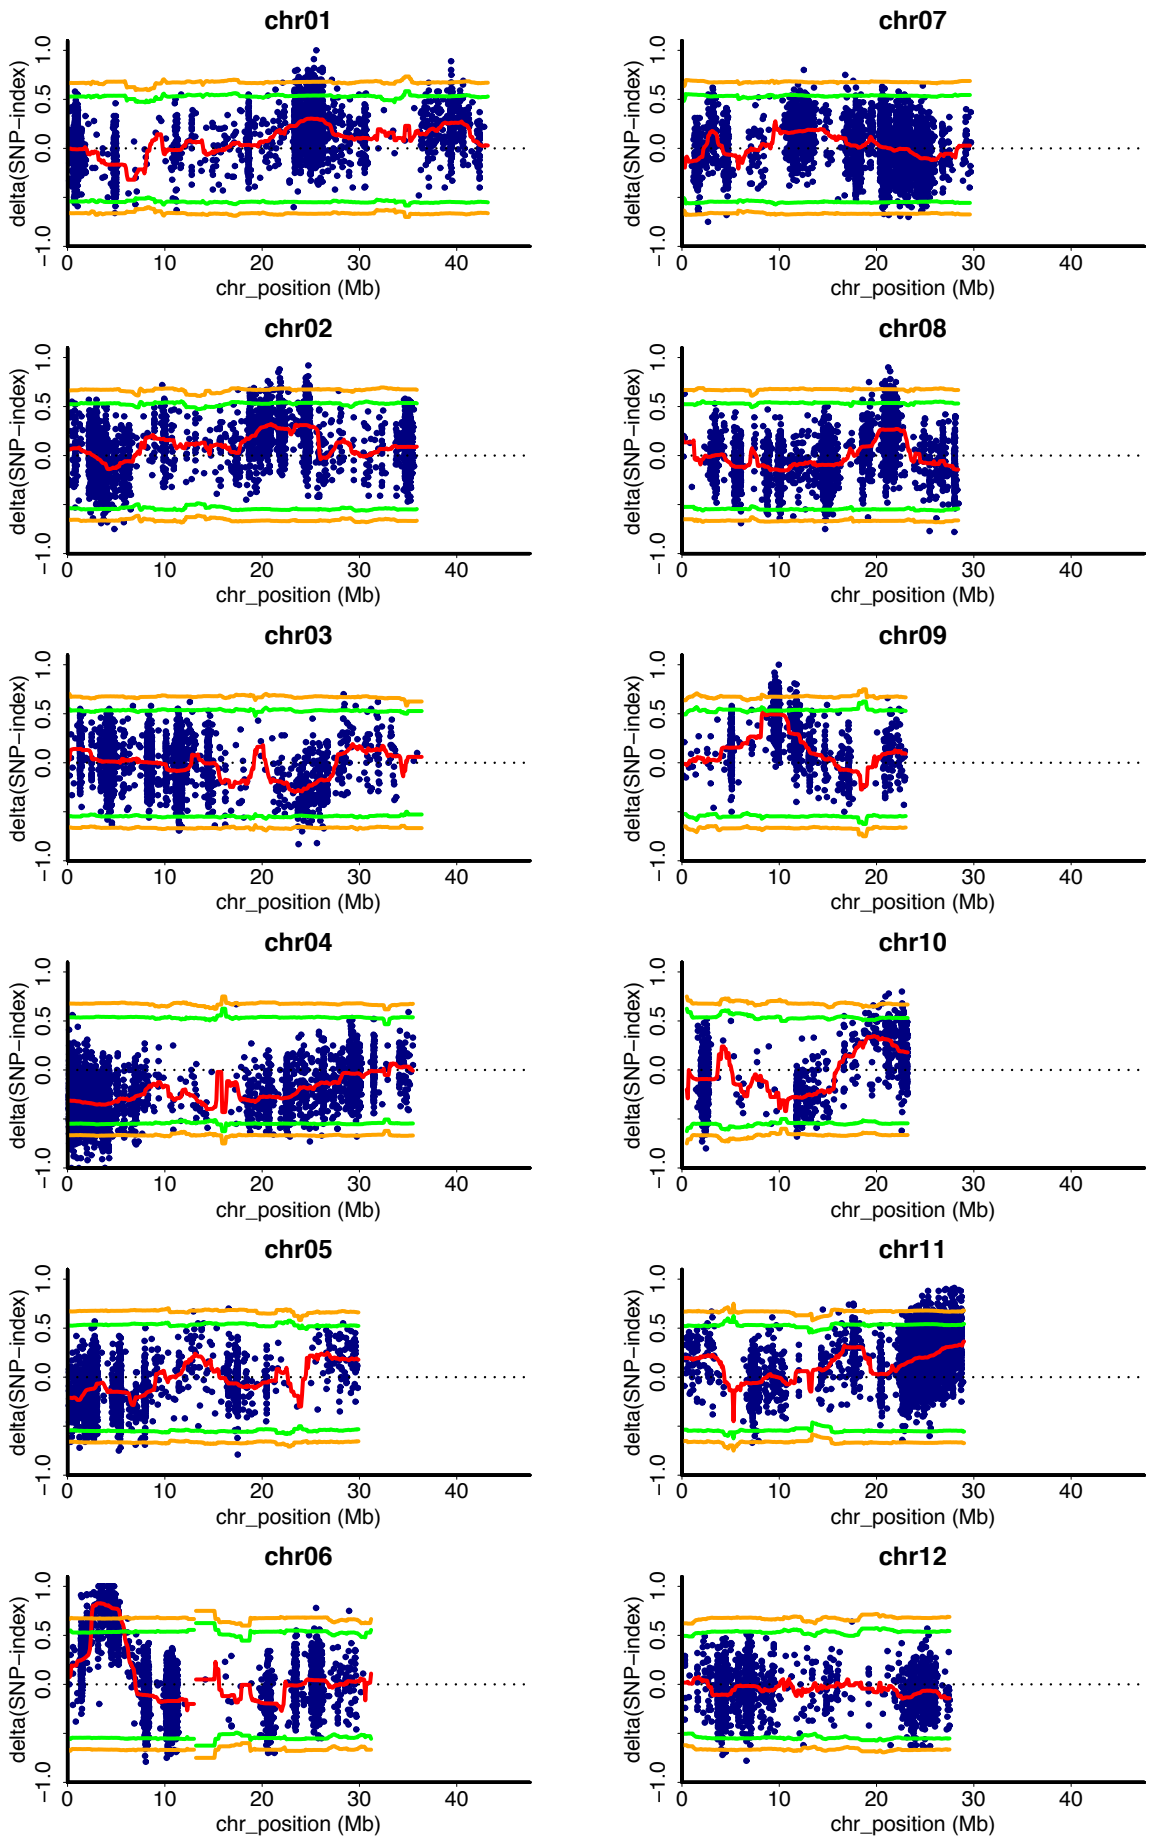

(E) QTL-seq plot of RILs from QTL-seq v1.4.5

The  $\Delta$ SNP-index plot obtained by subtraction of susceptible-bulk SNP-index from resistance-bulk SNP-index for RILs obtained from a cross between Nortai and Hitomebore. Statistical confidence intervals under the null hypothesis of no QTL are shown (green:  $P < 0.05$ ; yellow:  $P < 0.01$ ).

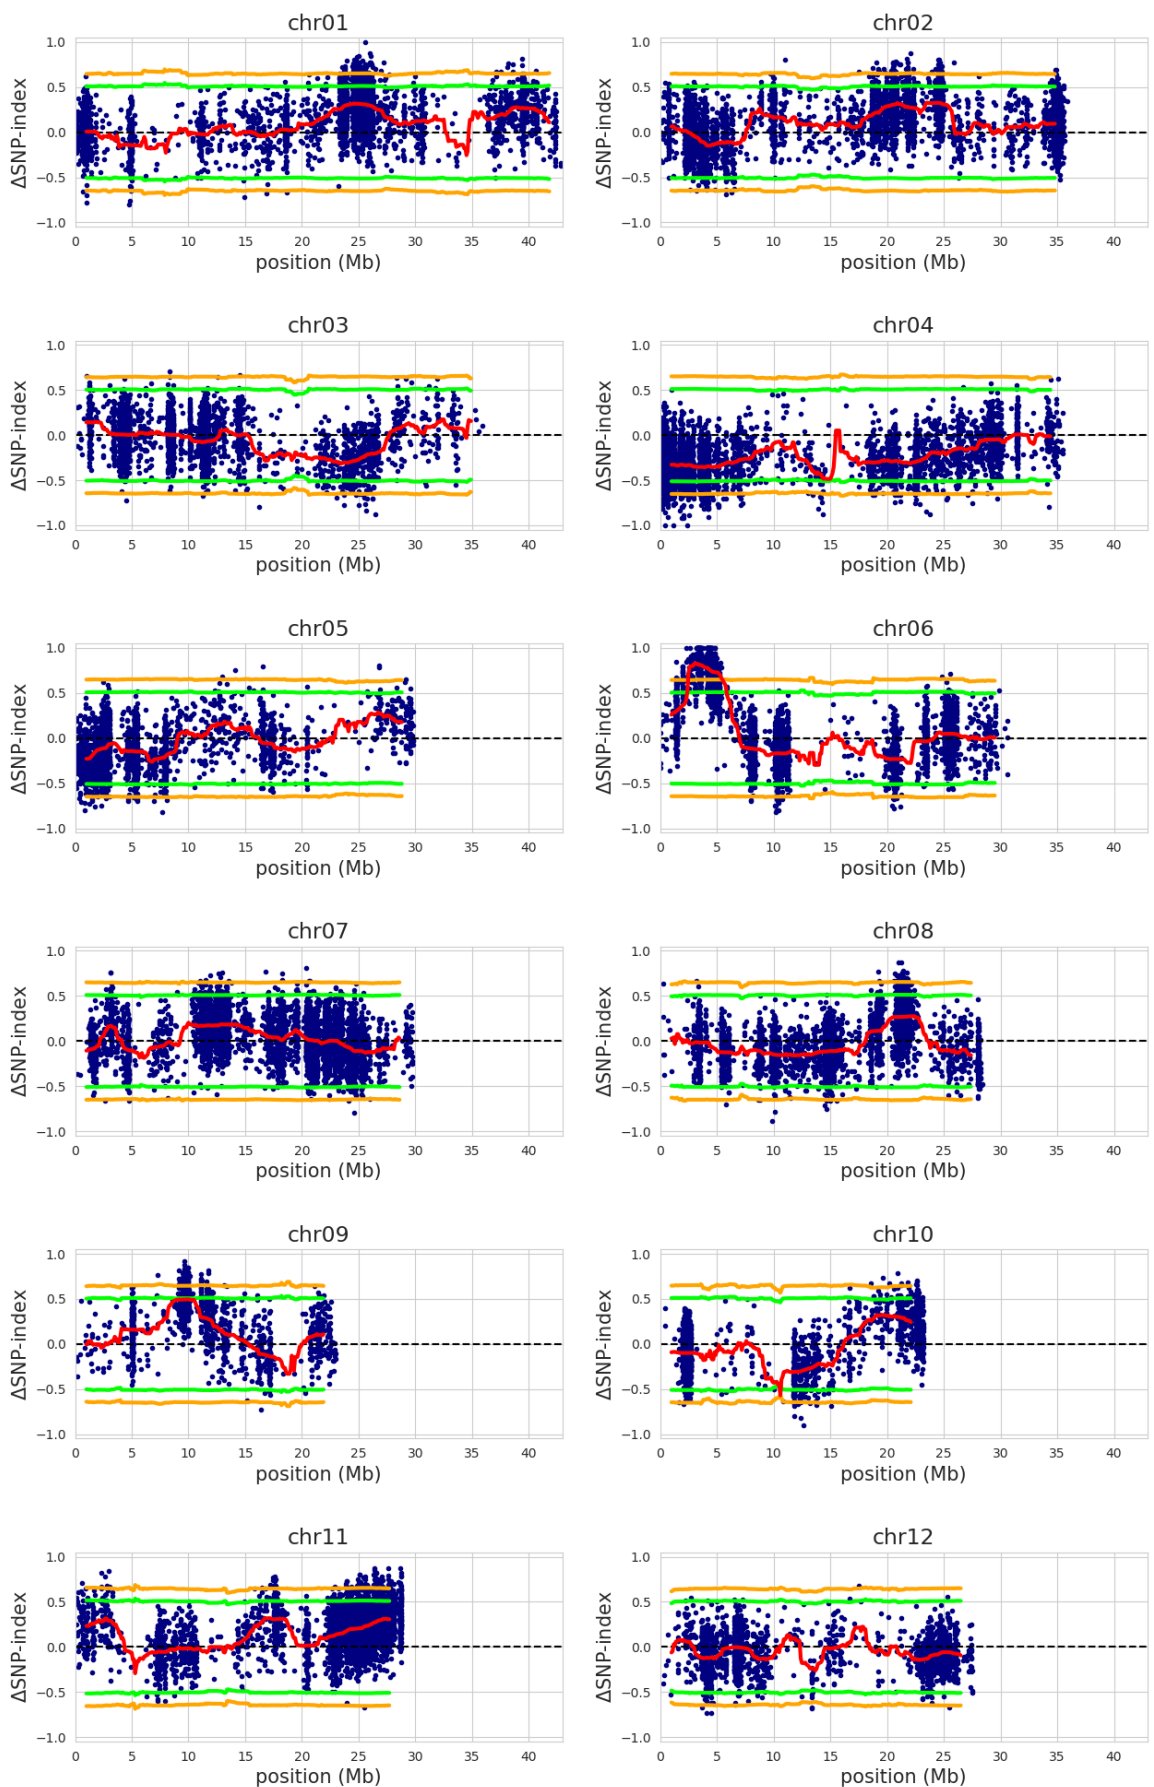

(F) QTL-seq plot of RILs from QTL-seq v2.0.6

The  $\Delta$ SNP-index plot obtained by subtraction of susceptible-bulk SNP-index from resistance-bulk SNP-index for RILs obtained from a cross between Nortai and Hitomebore. Statistical confidence intervals under the null hypothesis of no QTL are shown (green:  $P < 0.05$ ; yellow:  $P < 0.01$ ).

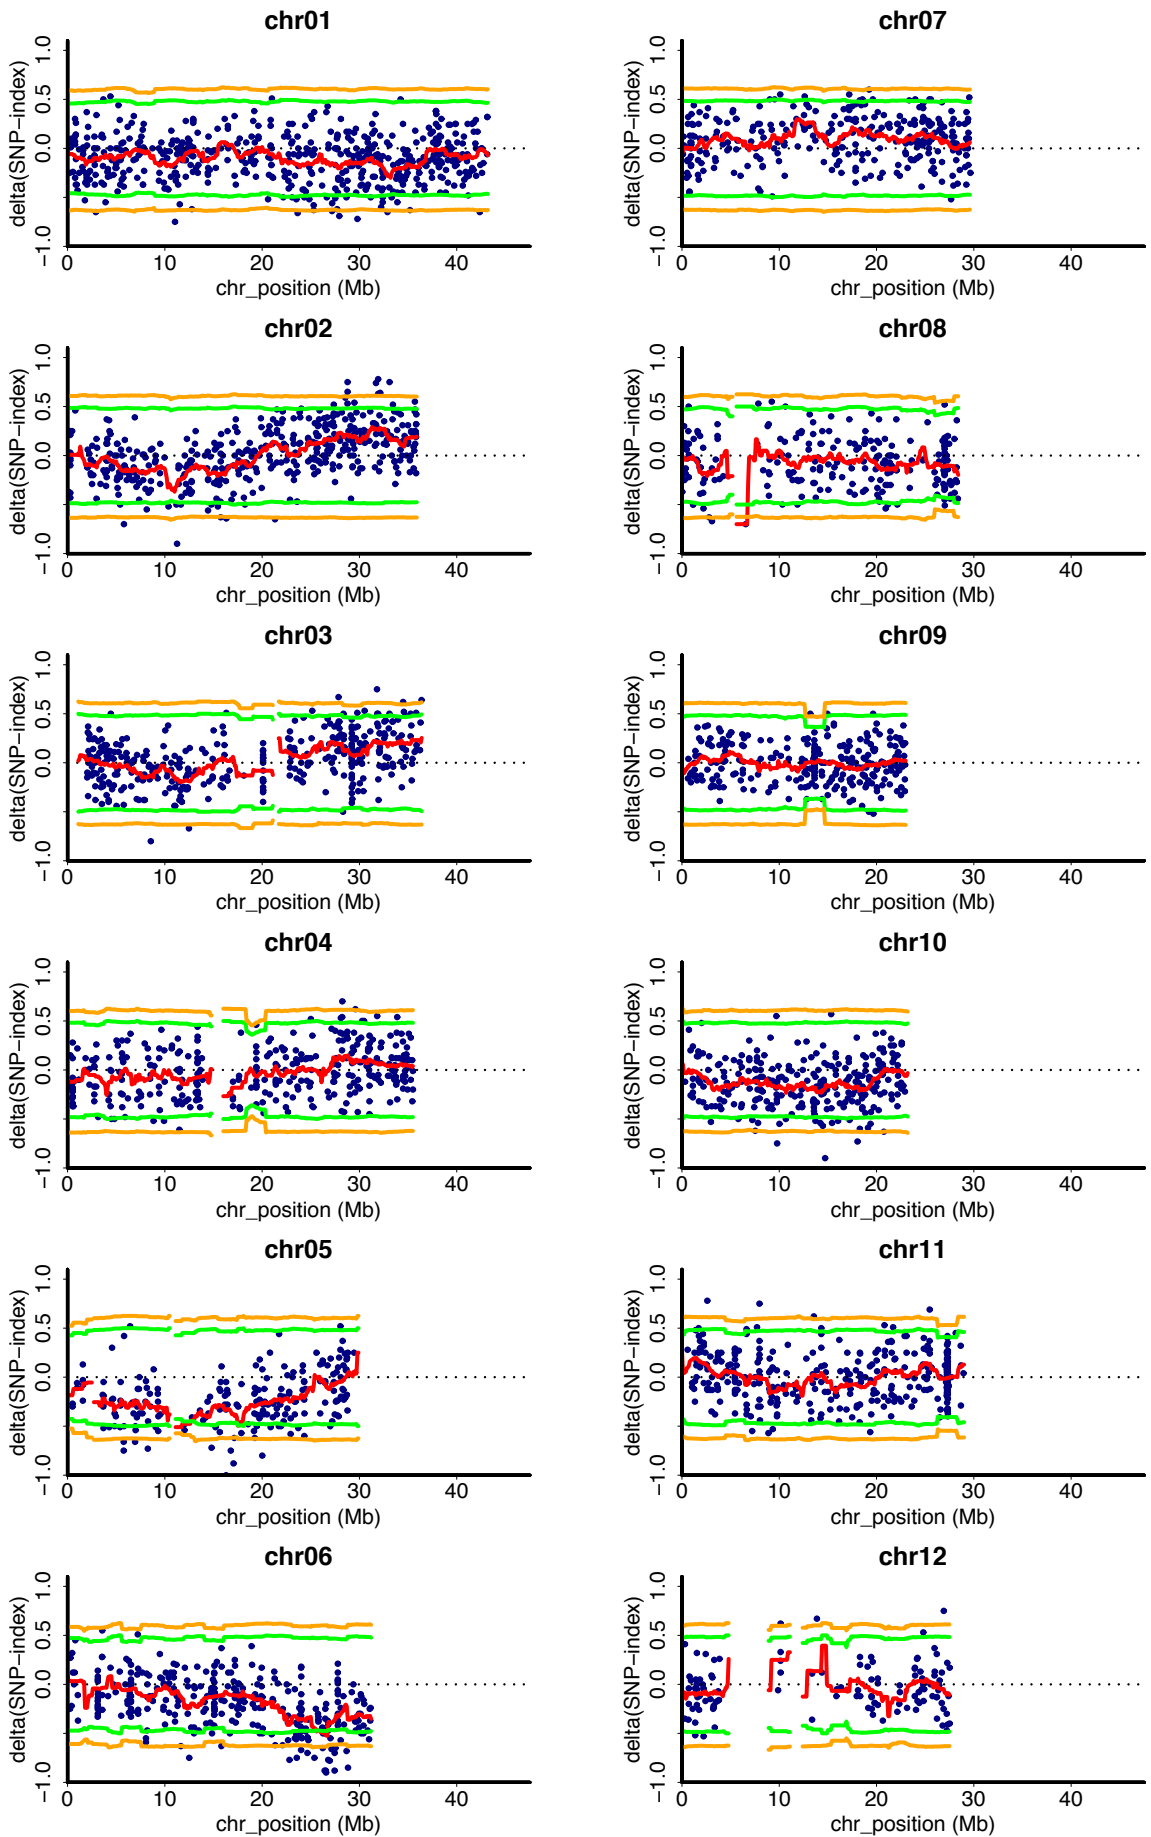

(G) QTL-seq plot of F2 progeny from QTL-seq v1.4.5

The  $\Delta$ SNP-index plot obtained by subtraction of Highest-bulk SNP-index from Lowest-bulk SNP-index for F2 progeny obtained from a cross between Hitomebore and WRC57.

Statistical confidence intervals under the null hypothesis of no QTL are shown (green:  $P < 0.05$ ; yellow:  $P < 0.01$ ).

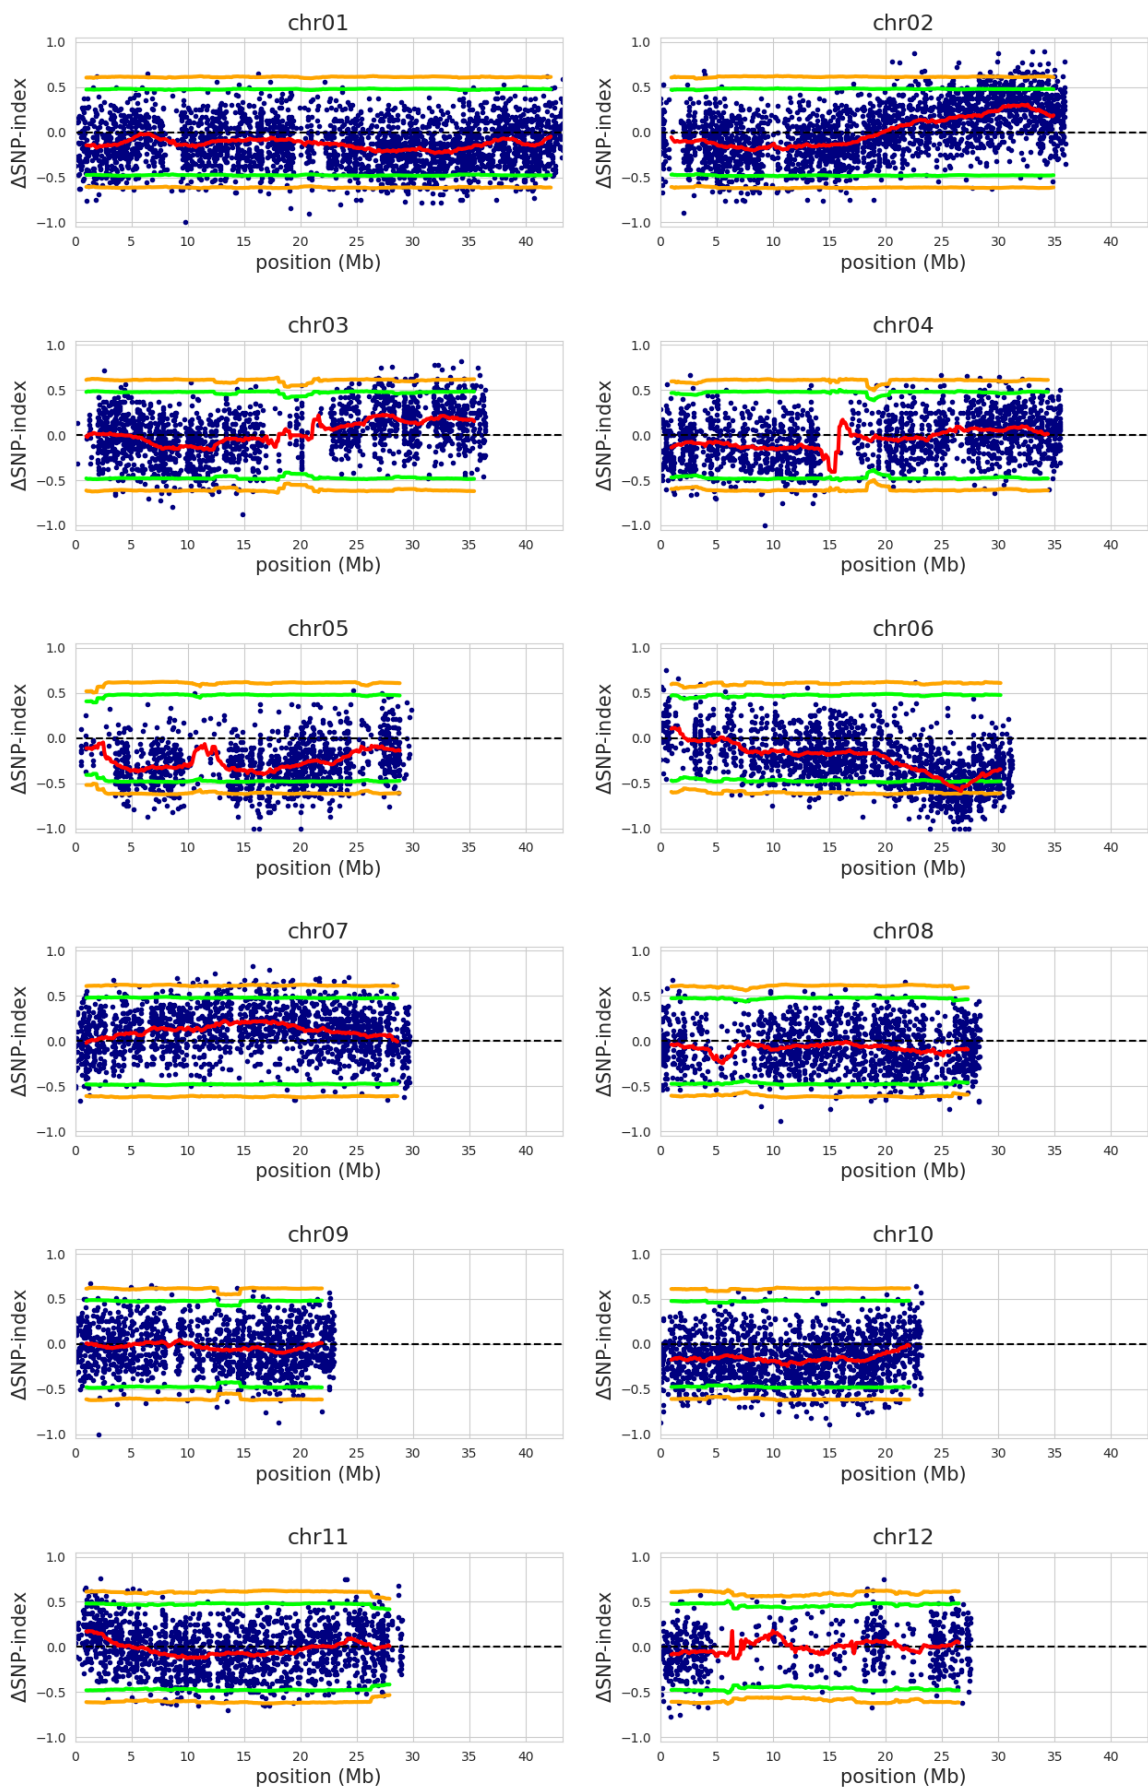

(H) QTL-seq plot of F2 progeny from QTL-seq v2.0.6

The  $\Delta$ SNP-index plot obtained by subtraction of Highest-bulk SNP-index from Lowest-bulk SNP-index for F2 progeny obtained from a cross between Hitomebore and WRC57.

Statistical confidence intervals under the null hypothesis of no QTL are shown (green:  $P < 0.05$ ; yellow:  $P < 0.01$ ).
